# Supplementary material for: Gut microbial dysbiosis in individuals with Sjögren’s syndrome
Source: PubMed Central journal article supplement (PMC7158097; doi:10.1186/s12934-020-01348-7), 2020-04-15
Supplement: 12934_2020_1348_MOESM1_ESM.pdf [file 12934_2020_1348_MOESM1_ESM.pdf]

# Additional Figure

Figure S1

**A**

Faith's PD (97CI)

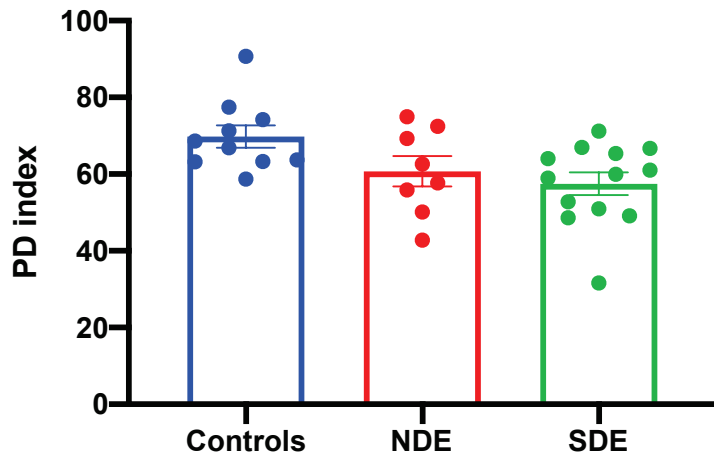

**B**

Faith's PD (99CI)

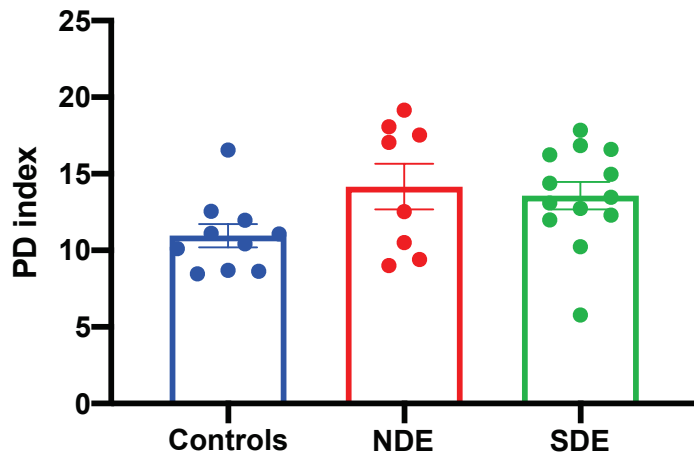

**p=0.0149 (Controls vs. SDE)**
